# Supplementary material
Source: PubMed Central journal article supplement (PMC2720063)
Supplement: NIHMS131791-supplement-upplement.pdf [file NIHMS131791-supplement-upplement.pdf]

## Supporting Data.

### SD Table 1A-C

Pyro

Hydrogen Bonds up to 3.5 Å (14 total)

| Peptide residue | Fab |                   | distance    |
|-----------------|-----|-------------------|-------------|
|                 | CDR | Protein residue   |             |
| pGlu3 N         | L3  | Ser97 O           | 3.19        |
| Phe4 N          | L3  | Ser97 O           | 3.46        |
| Phe4 O          | L1  | His31 NE2         | 2.91        |
| <b>Arg5 NH1</b> | H2  | <b>Asp56 OD1</b>  | <b>2.65</b> |
| <b>Arg5 NH1</b> | H2  | <b>Asp56 OD2</b>  | <b>2.99</b> |
| Arg5 NH2        | H3  | His102 NE2        | 3.41        |
| <b>Arg5 NH2</b> | H2  | <b>Asp56 OD2</b>  | <b>2.81</b> |
| <b>His6 ND1</b> | H3  | <b>Asp108 OD2</b> | <b>2.7</b>  |
| <b>His6 ND1</b> | H3  | <b>Asp108 OD1</b> | <b>3.03</b> |
| His6 NE2        | L3  | Gly96 O           | 2.65        |
| His6 O          | L1  | Asn33 ND2         | 3.39        |
| Asp7 N          | H3  | His102 O          | 2.9         |
| <b>Asp7 OD1</b> | H3  | <b>His102 ND1</b> | <b>3.18</b> |
| <b>Asp7 OD2</b> | H3  | <b>His102 ND1</b> | <b>3.46</b> |

Ror2(518-525)

Hydrogen Bonds up to 3.5 Å (13 total)

| Peptide residue | Fab |                   | distance |
|-----------------|-----|-------------------|----------|
|                 | CDR | Protein residue   |          |
| <b>Glu3 OE2</b> | L3  | <b>His98 ND1</b>  | 2.94     |
| Phe4 N          | L3  | Ser97 O           | 3.31     |
| Phe4 O          | L1  | His31 NE2         | 3.26     |
| Arg5 NE         | H3  | His102 NE2        | 3.21     |
| <b>Arg5 NH1</b> | H2  | <b>Asp56 OD2</b>  | 3.29     |
| <b>Arg5 NH1</b> | H2  | <b>Asp56 OD1</b>  | 2.55     |
| Arg5 NH2        | H3  | His102 NE2        | 3.39     |
| <b>Arg5 NH2</b> | H2  | <b>Asp56 OD2</b>  | 2.94     |
| <b>His6 ND1</b> | H3  | <b>Asp108 OD1</b> | 3.31     |
| <b>His6 ND1</b> | H3  | <b>Asp108 OD2</b> | 2.81     |
| His6 NE2        | L3  | Gly96 O           | 2.63     |
| Glu7 N          | H3  | His102 O          | 2.73     |
| <b>Glu7 OE2</b> | H3  | <b>His102 ND1</b> | 3.41     |

A $\beta$ (1-8) WT <sup>6</sup>

Hydrogen Bonds up to 3.5 Å (18 total)

| Peptide residue | Fab |                  | distance |
|-----------------|-----|------------------|----------|
|                 | CDR | Protein residue  |          |
| Ala2 O          | L3  | Val99 N          | 2.89     |
| <b>Glu3 OE1</b> | L1  | <b>His31 NE2</b> | 3.27     |
| Glu3 OE1        | L1  | Ser32 OG         | 2.68     |
| Glu3 OE2        | L1  | Ser32 N          | 2.72     |

|                 |    |                   |      |
|-----------------|----|-------------------|------|
| Glu3 OE2        | L1 | Ser32 OG          | 3.49 |
| Phe4 N          | L3 | Ser97 O           | 2.85 |
| Phe4 O          | L1 | His31 NE2         | 3.18 |
| Arg5 NE         | H3 | His102 NE2        | 3.32 |
| <b>Arg5 NH1</b> | H2 | <b>Asp56 OD1</b>  | 2.77 |
| <b>Arg5 NH1</b> | H2 | <b>Asp56 OD2</b>  | 3.28 |
| Arg5 NH2        | H3 | His102 NE2        | 3.45 |
| <b>Arg5 NH2</b> | H2 | <b>Asp56 OD2</b>  | 2.86 |
| <b>His6 ND1</b> | H3 | <b>Asp108 OD1</b> | 3.17 |
| <b>His6 ND1</b> | H3 | <b>Asp108 OD2</b> | 2.55 |
| His6 NE2        | L3 | Gly96 O           | 2.73 |
| Asp7 N          | H3 | His102 O          | 2.8  |
| <b>Asp7 OD1</b> | H3 | <b>His102 ND1</b> | 2.77 |
| Asp7 O          | L1 | Asn33 ND2         | 2.79 |
